# Supplementary material for: Efficient dye-sensitized solar cells using mesoporous submicrometer TiO2 beads
Source: Royal Society of Chemistry journal article supplement (doi:10.1039/c5ra11281h), 2015-01-01
Supplement: c5ra11281h1.pdf [file c5ra11281h1.pdf]

Supporting information  
For RSC Advances

## Efficient Dye-sensitized Solar Cells using Mesoporous Submicrometer TiO<sub>2</sub> Beads

Kun Cao,<sup>a</sup> Jianfeng Lu,<sup>a</sup> Hao Li,<sup>a</sup> Yan Shen<sup>a</sup> and Minkui Wang<sup>a\*</sup>

<sup>a</sup> Michael Grätzel Center for Mesoscopic Solar Cells, Wuhan National Laboratory for Optoelectronics, Huazhong University of Science and Technology, 1037 Luoyu Road, 430074 Wuhan, P. R. China.  
E-mail: minkui.wang@mail.hust.edu.cn

### Table of contents:

|                                                                           |    |
|---------------------------------------------------------------------------|----|
| 1. BET measurements for TiO <sub>2</sub> nanoparticles                    | P2 |
| 2. Diffuse reflectance spectra of TiO <sub>2</sub> nanoparticles film     | P2 |
| 3. J-V curve of DSSC with commercial 20 nm TiO <sub>2</sub> nanoparticles | P3 |
| 4. The IPCE spectra of devices D, E and F                                 | P3 |
| 5. J-V curves of DSSCs prepared using sequential soaking method           | P4 |

## 1. BET measurements for TiO<sub>2</sub> nanoparticles

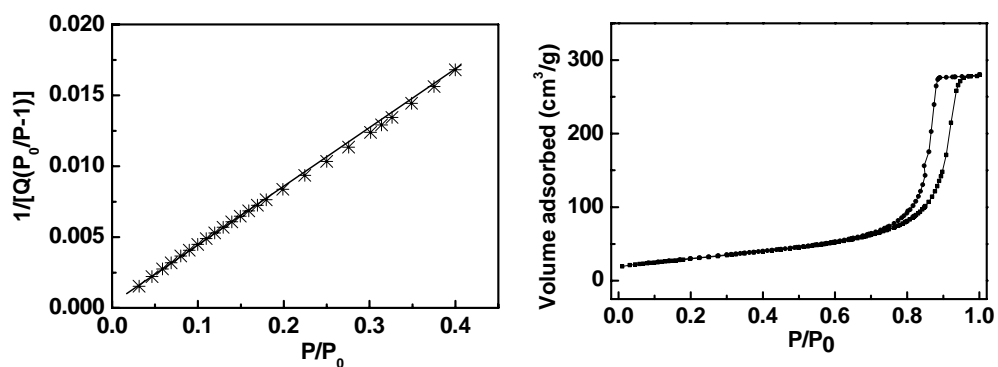

Figure S1 BET measurements for TiO<sub>2</sub> nanoparticles

## 2. Diffuse reflectance spectra of TiO<sub>2</sub> nanoparticles film

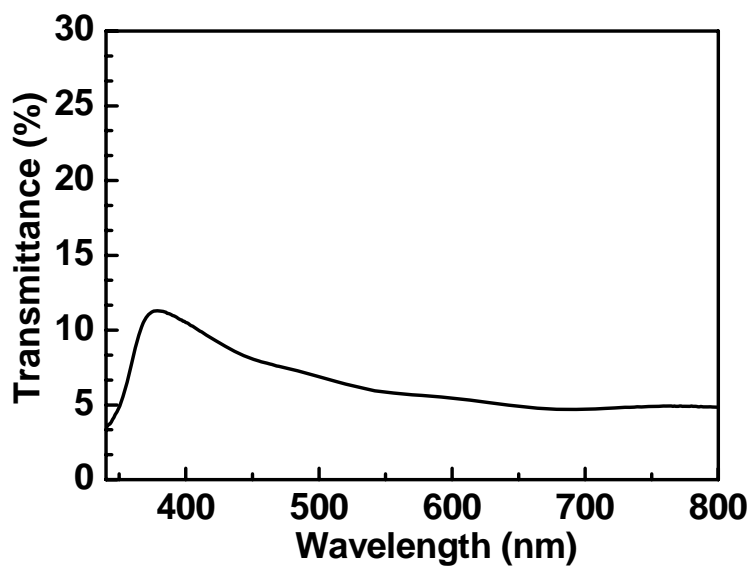

Figure S2 Diffuse reflectance spectra of TiO<sub>2</sub> nanoparticles film

### 3. J-V curve of DSSC with commercial 20 nm TiO<sub>2</sub> nanoparticles

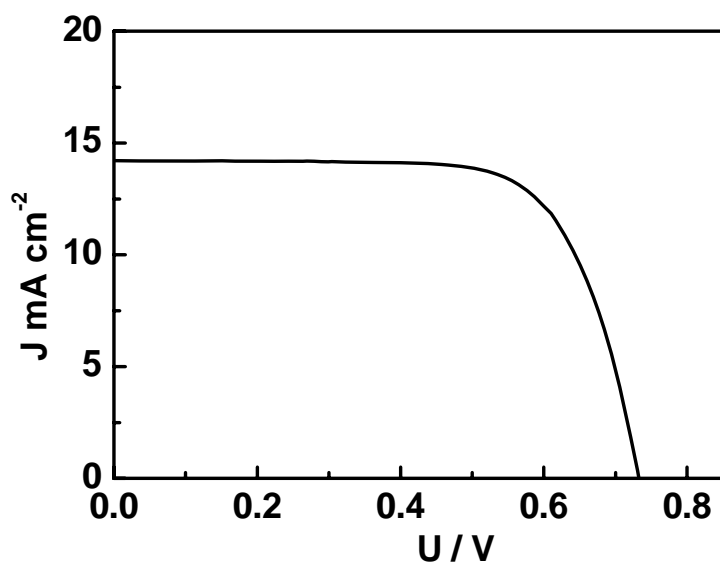

Figure S3 J-V curve of DSSC with commercial 20 nm TiO<sub>2</sub> nanoparticles

### 4. The IPCE spectra of devices D, E and F

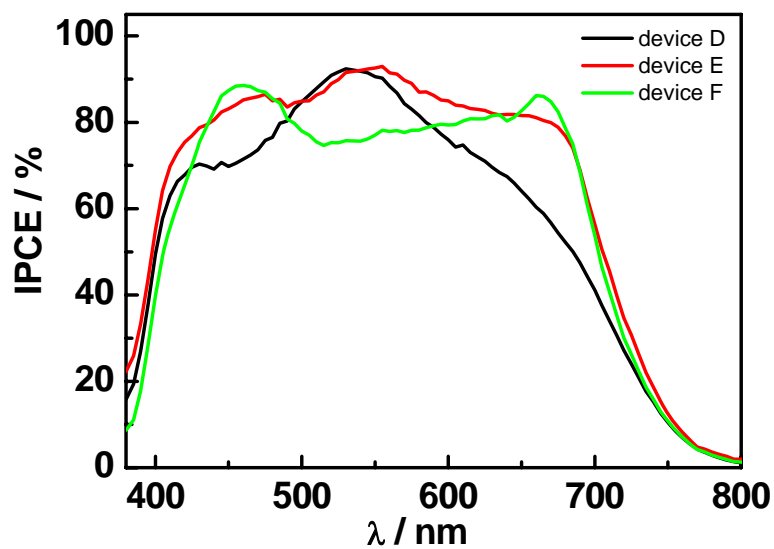

Figure S4 The IPCE spectra of devices D (with PDB-LW4/PDB-KW1(1:1)), E (with PDB-LW4/PDB-KW1(1:2)) and F (with PDB-LW4/PDB-KW1(1:3))

## 5. J-V curves of DSSCs using sequential soaking method

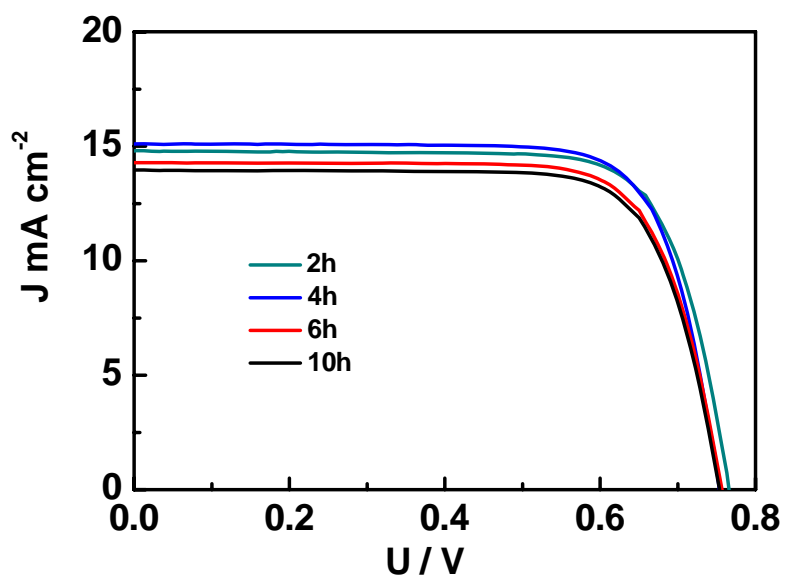

**Figure S5** J-V curves of the DSSC devices prepared using sequential soaking method with different dipping time
